# Supplementary material for: Synthesis and characterization of spherical porous calcium carbonate with ordered secondary structures in the presence of polymer with double hydrophilic ionic moieties
Source: Royal Society of Chemistry journal article supplement (doi:10.1039/c1ce05897e), 2011-12-14
Supplement: c1ce05897e.pdf [file c1ce05897e.pdf]

# Synthesis and characterization of spherical porous calcium carbonate with ordered secondary structures in the presence of polymer with double hydrophilic ionic moieties

Feng-Wen Yan<sup>a</sup>, Cun-Yue Guo<sup>\*b</sup>, Xiao-Hui Zhang<sup>a,b</sup>, Guo-Qing Yuan<sup>\*a</sup>

## Supplementary Information

### Characterization of SPASP

**FT-IR analysis:** Fourier transform IR spectra were measured on a Nicolet 6700 Fourier transform IR spectrophotometer using the KBr pellet technique. All the peaks are well assigned (Fig. S1). 3350  $\text{cm}^{-1}$  was ascribed to stretching vibration of N-H in secondary amide, the vibration of C=O in imide appearing at 1717  $\text{cm}^{-1}$  was broadened to characteristic absorption peak of the secondary amide. Strong absorption peak at 1667  $\text{cm}^{-1}$  was attributed to vibronic coupling of the two "C=O" bonds in carboxyl group. Peak at 1402  $\text{cm}^{-1}$  corresponds to the symmetric stretching of "C=O". Characteristic absorption peaks ascribed to sulfonate were observed at 1043 and 1197  $\text{cm}^{-1}$ , indicating the target product is sulfonated poly(aspartic acid).

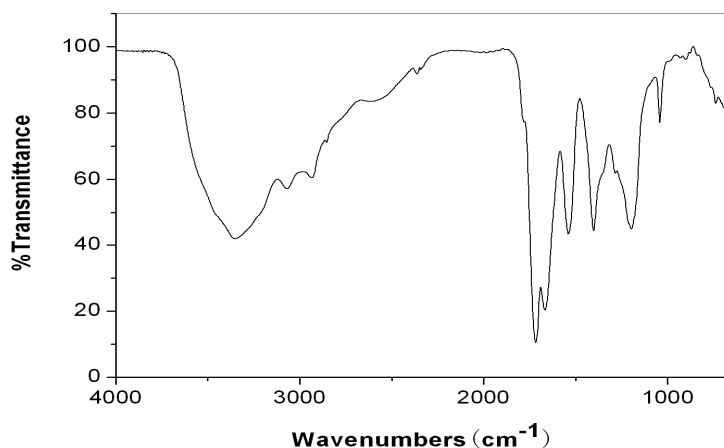

Fig. S1 FT-IR spectra of sulfonated poly(aspartic acid)

**Composition analysis:** Elemental analysis was performed on Carlo Erba 1106 to determine contents of N, H, O, and S; the calibration of S was in accordance with barium salt analysis. Results show that the sulfonic groups occupied 10% of the sum of sulfonic groups and carboxylic groups (based on PASP).

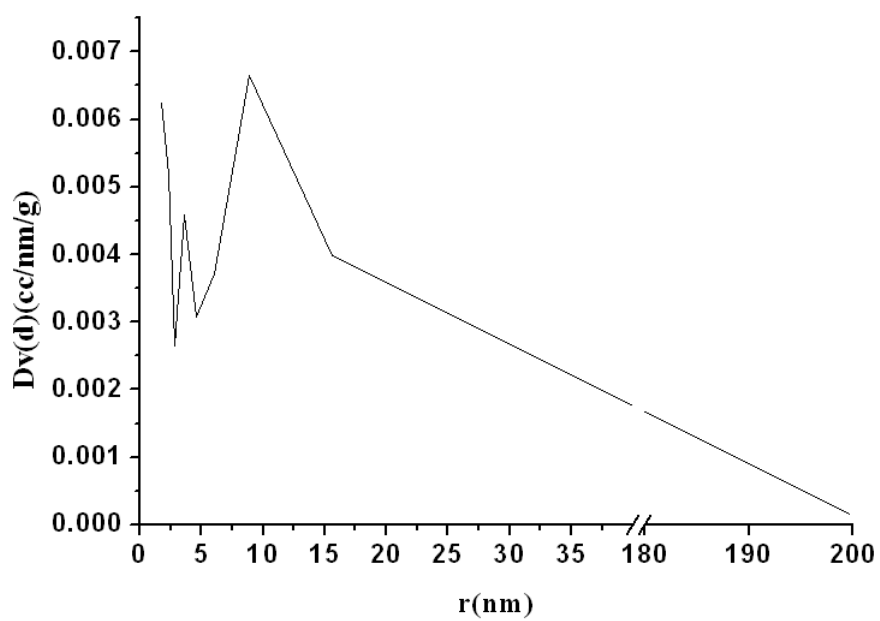

Fig. S2 Pore size distribution of microspheres formed at  $c_{\text{SPASP}} = 0.1 \text{ g/L}$

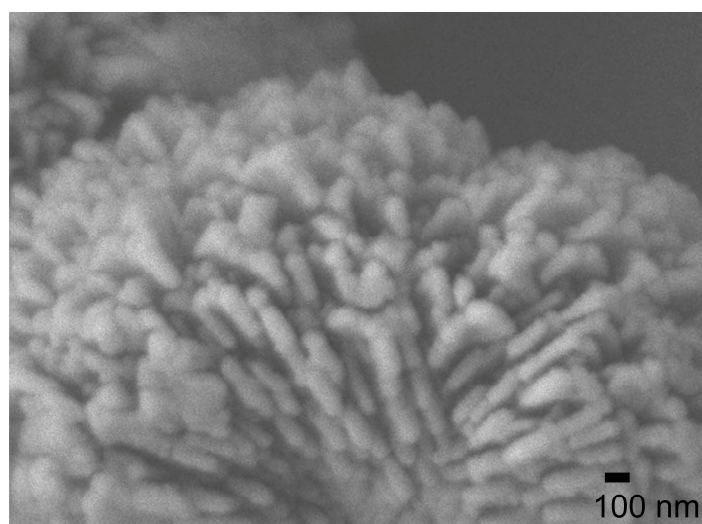

Fig. S3 SEM image of the broken pieces of microspheres

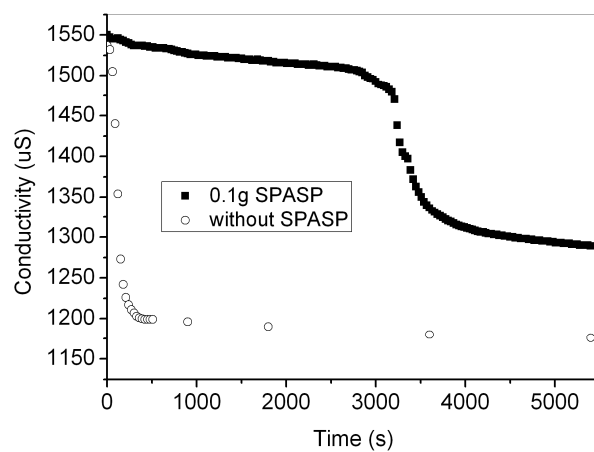

Fig. S4 The observed conductivity with respect to time of the crystallization solution
